# Supplementary material
Source: Springer Nature journal article supplement (http://www.springermedizin.de/resource/supplementary/12937_2010_305_MOESM1_ESM.pdf/25654828)

Initial Screening

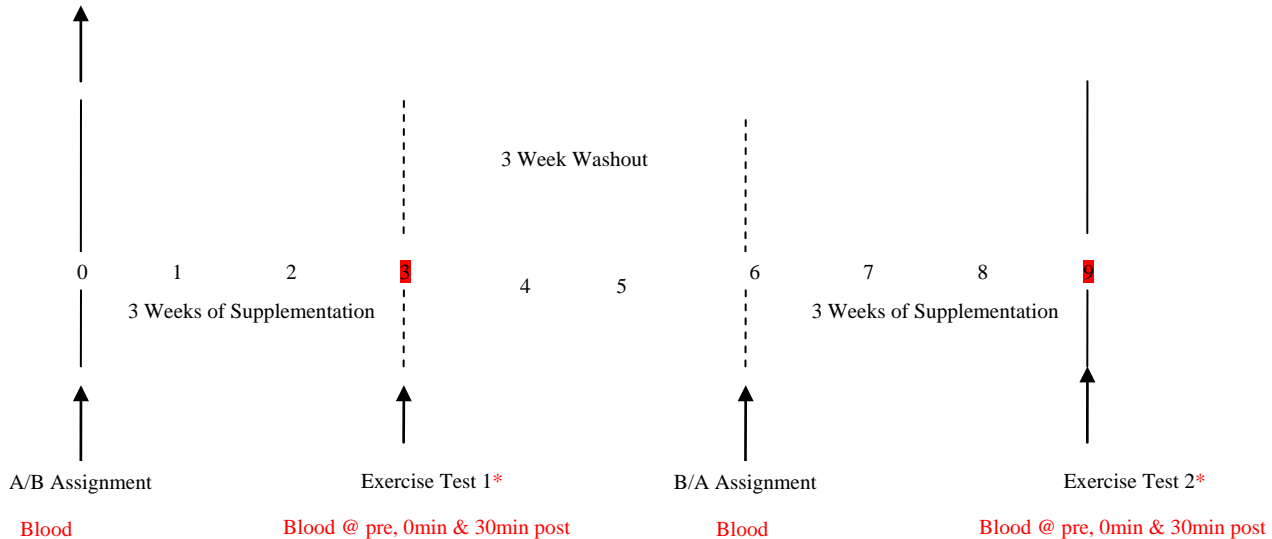

\* No Exercise 48 hours prior to testing session

Supplement: MOESM1 [file 25654828]
